# Supplementary material for: Effect of an internet- and app-based stress intervention compared to online psychoeducation in university students with depressive symptoms: Results of a randomized controlled trial
Source: PubMed Central journal article supplement (PMC7932886; doi:10.1016/j.invent.2021.100374), 2021-02-24

## SUPPLEMENT

*Effects of an Internet- and App-based Stress Intervention in University Students with Depressive Symptoms: Results of a Randomized Controlled Trial*

Table S1. *Between-group Effect Sizes and Results of Analyses of Covariance (ANCOVA) in the Study Completer Sample for the Primary and Secondary Outcomes at Post-Test and Follow-Up.*

| Outcome and Assessment Point                | Effect Size |            | ANCOVA                    |          |
|---------------------------------------------|-------------|------------|---------------------------|----------|
|                                             | <i>d</i>    | 95%CI      | <i>F</i> <sub>1,141</sub> | <i>p</i> |
| <b>Primary Outcome</b>                      |             |            |                           |          |
| Depression (CES-D)                          |             |            |                           |          |
| - Post                                      | 0.43        | 0.11-0.75  | 9.37                      | <0.001   |
| - Follow-up                                 | 0.46        | 0.14-0.78  | 9.23                      | <0.001   |
| <b>Mental Health</b>                        |             |            |                           |          |
| Behavioral Activation for Depression (BADS) |             |            |                           |          |
| - Post                                      | 0.75        | 0.44-1.06  | 29.15                     | <0.001   |
| - Follow-up                                 | 0.63        | 0.32-0.94  | 18.80                     | <0.001   |
| Perceived Stress (PSS-10)                   |             |            |                           |          |
| - Post                                      | 0.55        | 0.23-0.86  | 15.26                     | <0.001   |
| - Follow-up                                 | 0.59        | 0.28-0.91  | 16.91                     | <0.001   |
| Anxiety (STAI-6)                            |             |            |                           |          |
| - Post                                      | 0.44        | 0.12-0.76  | 8.83                      | 0.003    |
| - Follow-up                                 | 0.40        | 0.08-0.73  | 6.29                      | 0.013    |
| Worrying (AWQ)                              |             |            |                           |          |
| - Post                                      | 0.47        | 0.15-0.79  | 12.91                     | <0.001   |
| - Follow-up                                 | 0.51        | 0.19-0.83  | 13.79                     | <0.001   |
| Emotional Exhaustion (MBI-S)                |             |            |                           |          |
| - Post                                      | 0.15        | 0.17-0.48  | 0.89                      | 0.346    |
| - Follow-up                                 | 0.77        | 0.47-1.08  | 33.65                     | <0.001   |
| <b>Academic Outcomes</b>                    |             |            |                           |          |
| Work Impairment (WIS)                       |             |            |                           |          |
| - Post                                      | 0.36        | 0.04-0.69  | 7.49                      | 0.007    |
| - Follow-up                                 | 0.45        | 0.13-0.77  | 9.72                      | 0.002    |
| Work Output (WOS)                           |             |            |                           |          |
| - Post                                      | 0.27        | -0.06-0.59 | 3.32                      | 0.070    |
| - Follow-up                                 | 0.32        | -0.01-0.64 | 4.67                      | 0.032    |
| Work Cutback (PS-S)                         |             |            |                           |          |
| - Post                                      | 0.24        | -0.09-0.57 | 2.22                      | 0.139    |
| - Follow-up                                 | 0.47        | 0.15-0.79  | 8.62                      | 0.004    |
| College Self-Efficacy (CSEI)                |             |            |                           |          |
| - Post                                      | -0.06       | -0.39-0.27 | 0.15                      | 0.699    |
| - Follow-up                                 | -0.13       | -0.45-0.20 | 0.57                      | 0.453    |

**Risk and Protective Factors**

|                                             |       |            |       |        |
|---------------------------------------------|-------|------------|-------|--------|
| Resilience (CD-RISC)                        |       |            |       |        |
| - Post                                      | 0.26  | -0.07-0.59 | 3.77  | 0.054  |
| - Follow-up                                 | 0.35  | 0.03-0.68  | 6.38  | 0.013  |
| Emotion Regulation Competencies (SEK-27)    |       |            |       |        |
| - Post                                      | 0.63  | 0.32-0.95  | 27.27 | <0.001 |
| - Follow-up                                 | 0.05  | -0.28-0.37 | 0.07  | 0.789  |
| Self-Compassion (SCS-D)                     |       |            |       |        |
| - Post                                      | 0.66  | 0.35-0.98  | 35.32 | <0.001 |
| - Follow-up                                 | 0.53  | 0.21-0.85  | 21.11 | <0.001 |
| Self-Esteem (RSES)                          |       |            |       |        |
| - Post                                      | 0.47  | 0.15-0.79  | 22.78 | <0.001 |
| - Follow-up                                 | -0.02 | -0.35-0.31 | 0.01  | 0.909  |
| Negative Beliefs about Stress (BASS)        |       |            |       |        |
| - Post                                      | 0.18  | -0.15-0.50 | 1.81  | 0.181  |
| - Follow-up                                 | 0.44  | 0.12-0.76  | 8.76  | 0.004  |
| Positive Beliefs about Stress (BASS)        |       |            |       |        |
| - Post                                      | 0.31  | 0.01-0.64  | 5.04  | 0.026  |
| - Follow-up                                 | 0.31  | 0.01-0.64  | 5.35  | 0.022  |
| Controllability Beliefs about Stress (BASS) |       |            |       |        |
| - Post                                      | 0.55  | 0.23-0.86  | 12.77 | 0.000  |
| - Follow-up                                 | 0.72  | 0.41-1.03  | 23.45 | 0.000  |

---

Table S2. Results of the joint Bayesian model for the Primary and Secondary Outcomes at Post-Test and Follow-Up.

| Outcome                                     | $\hat{b}$ | SE   | 95%CrI      |
|---------------------------------------------|-----------|------|-------------|
| <b>Primary Outcome</b>                      |           |      |             |
| Depression (CES-D)                          |           |      |             |
| - Post                                      | -3.03     | 1.28 | -5.54--0.53 |
| - Follow-up                                 | -2.88     | 1.44 | -5.70--0.07 |
| <b>Mental Health</b>                        |           |      |             |
| Behavioral Activation for Depression (BADs) |           |      |             |
| - Post                                      | 14.78     | 3.12 | 8.75-20.92  |
| - Follow-up                                 | 14.53     | 4.40 | 6.11-23.20  |
| Perceived Stress (PSS-10)                   |           |      |             |
| - Post                                      | -3.08     | 0.88 | -4.81--1.36 |
| - Follow-up                                 | -2.34     | 1.22 | -4.73-0.04  |
| Anxiety (STAI-6)                            |           |      |             |
| - Post                                      | -1.26     | 0.57 | -2.36--0.13 |
| - Follow-up                                 | -0.59     | 0.69 | -1.98-0.73  |
| Worrying (AWQ)                              |           |      |             |
| - Post                                      | -1.65     | 0.74 | -3.09--0.19 |
| - Follow-up                                 | -1.27     | 0.94 | -3.12-0.57  |
| Emotional Exhaustion (MBI-S)                |           |      |             |
| - Post                                      | -0.42     | 0.84 | -2.07-1.24  |
| - Follow-up                                 | -3.69     | 0.92 | -5.49--1.87 |
| <b>Academic Outcomes</b>                    |           |      |             |
| Work Impairment (WIS)                       |           |      |             |
| - Post                                      | -1.66     | 0.88 | -3.38-0.06  |
| - Follow-up                                 | -2.81     | 1.10 | -4.98--0.68 |
| Work Output (WOS)                           |           |      |             |
| - Post                                      | 7.30      | 3.89 | -0.34-14.95 |
| - Follow-up                                 | 7.94      | 5.32 | -2.83-17.8  |
| Work Cutback (PS-S)                         |           |      |             |
| - Post                                      | -2.13     | 1.59 | -5.26-0.99  |
| - Follow-up                                 | -5.22     | 2.37 | -9.85--0.59 |
| College Self-Efficacy (CSEI)                |           |      |             |
| - Post                                      | -1.18     | 1.81 | -4.71-2.39  |
| - Follow-up                                 | -0.20     | 2.52 | -5.13-4.74  |
| <b>Risk and Protective Factors</b>          |           |      |             |
| Resilience (CD-RISC)                        |           |      |             |
| - Post                                      | 0.45      | 0.23 | 0.00-0.89   |
| - Follow-up                                 | 0.84      | 0.29 | 0.29-1.41   |

|                                             |       |      |             |
|---------------------------------------------|-------|------|-------------|
| Emotion Regulation Competencies (SEK-27)    |       |      |             |
| - Post                                      | 8.50  | 1.72 | 5.14-11.84  |
| - Follow-up                                 | 4.10  | 3.46 | -2.48-10.99 |
| Self-Compassion (SCS-D)                     |       |      |             |
| - Post                                      | 4.74  | 1.00 | 2.76-6.70   |
| - Follow-up                                 | 5.45  | 1.24 | 3.00-7.87   |
| Self-Esteem (RSES)                          |       |      |             |
| - Post                                      | 1.76  | 0.58 | 0.62-2.92   |
| - Follow-up                                 | 1.22  | 1.43 | -1.76-3.88  |
| Negative Beliefs about Stress (BASS)        |       |      |             |
| - Post                                      | -0.41 | 0.51 | -1.4-0.58   |
| - Follow-up                                 | -1.75 | 0.59 | -2.91--0.60 |
| Positive Beliefs about Stress (BASS)        |       |      |             |
| - Post                                      | 0.82  | 0.36 | 0.11-1.52   |
| - Follow-up                                 | 0.75  | 0.40 | -0.05-1.53  |
| Controllability Beliefs about Stress (BASS) |       |      |             |
| - Post                                      | 1.13  | 0.25 | 0.63-1.63   |
| - Follow-up                                 | 1.53  | 0.31 | 0.91-2.12   |

---

Table S3. *Estimated Outcome Intercorrelations (joint Bayesian model)*

| Post-Test (7 weeks)                  | Depression | Activation | Stress | Emotional Exhaustion | Positive Beliefs about Stress | Negative Beliefs about Stress | Controllability Beliefs about Stress | Anxiety | Resilience | Worrying | College Self-Efficacy | Self-Esteem | Emotion Regulation | Self-Compassion | Work Impairment | Work Output | Work Cutback |
|--------------------------------------|------------|------------|--------|----------------------|-------------------------------|-------------------------------|--------------------------------------|---------|------------|----------|-----------------------|-------------|--------------------|-----------------|-----------------|-------------|--------------|
|                                      | Depression | 1.00       | -0.48  | 0.57                 | 0.19                          | -0.12                         | 0.14                                 | -0.18   | 0.30       | -0.28    | 0.25                  | -0.09       | -0.44              | -0.35           | -0.19           | 0.27        | -0.28        |
| Activation                           | -0.48      | 1.00       | -0.53  | -0.26                | 0.14                          | -0.16                         | 0.19                                 | -0.37   | 0.23       | -0.21    | 0.13                  | 0.41        | 0.34               | 0.21            | -0.39           | 0.32        | -0.18        |
| Stress                               | 0.57       | -0.53      | 1.00   | 0.26                 | -0.21                         | 0.25                          | -0.35                                | 0.41    | -0.22      | 0.25     | -0.14                 | -0.38       | -0.44              | -0.25           | 0.33            | -0.27       | 0.04         |
| Emotional Exhaustion                 | 0.19       | -0.26      | 0.26   | 1.00                 | -0.11                         | 0.13                          | -0.11                                | 0.14    | -0.05      | 0.25     | -0.23                 | -0.04       | -0.14              | -0.03           | 0.25            | -0.10       | 0.05         |
| Positive Beliefs about Stress        | -0.12      | 0.14       | -0.21  | -0.11                | 1.00                          | -0.36                         | 0.28                                 | 0.04    | 0.17       | 0.02     | 0.09                  | -0.01       | 0.13               | 0.03            | 0.00            | 0.10        | 0.01         |
| Negative Beliefs about Stress        | 0.14       | -0.16      | 0.25   | 0.13                 | -0.36                         | 1.00                          | -0.08                                | 0.06    | -0.10      | 0.02     | -0.14                 | -0.07       | -0.09              | -0.10           | 0.14            | -0.22       | 0.10         |
| Controllability Beliefs about Stress | -0.18      | 0.19       | -0.35  | -0.11                | 0.28                          | -0.08                         | 1.00                                 | -0.14   | 0.17       | -0.06    | 0.14                  | 0.21        | 0.28               | 0.17            | -0.06           | 0.06        | 0.05         |
| Anxiety                              | 0.30       | -0.37      | 0.41   | 0.14                 | 0.04                          | 0.06                          | -0.14                                | 1.00    | -0.12      | 0.17     | -0.11                 | -0.15       | -0.21              | -0.23           | 0.34            | -0.14       | 0.07         |
| Resilience                           | -0.28      | 0.23       | -0.22  | -0.05                | 0.17                          | -0.10                         | 0.17                                 | -0.12   | 1.00       | -0.15    | 0.07                  | 0.30        | 0.24               | 0.11            | -0.12           | 0.15        | 0.03         |
| Worrying                             | 0.25       | -0.21      | 0.25   | 0.25                 | 0.02                          | 0.02                          | -0.06                                | 0.17    | -0.15      | 1.00     | -0.04                 | -0.31       | -0.23              | -0.11           | 0.15            | -0.03       | 0.04         |
| College Self-Efficacy                | -0.09      | 0.13       | -0.14  | -0.23                | 0.09                          | -0.14                         | 0.14                                 | -0.11   | 0.07       | -0.04    | 1.00                  | -0.02       | 0.16               | -0.04           | -0.23           | 0.16        | -0.03        |
| Self-Esteem                          | -0.44      | 0.41       | -0.38  | -0.04                | -0.01                         | -0.07                         | 0.21                                 | -0.15   | 0.30       | -0.31    | -0.02                 | 1.00        | 0.31               | 0.39            | -0.26           | 0.12        | -0.03        |
| Emotion Regulation                   | -0.35      | 0.34       | -0.44  | -0.14                | 0.13                          | -0.09                         | 0.28                                 | -0.21   | 0.24       | -0.23    | 0.16                  | 0.31        | 1.00               | 0.24            | -0.21           | 0.13        | 0.00         |
| Self-Compassion                      | -0.19      | 0.21       | -0.25  | -0.03                | 0.03                          | -0.10                         | 0.17                                 | -0.23   | 0.11       | -0.11    | -0.04                 | 0.39        | 0.24               | 1.00            | -0.29           | 0.14        | -0.03        |
| Work Impairment                      | 0.27       | -0.39      | 0.33   | 0.25                 | 0.00                          | 0.14                          | -0.06                                | 0.34    | -0.12      | 0.15     | -0.23                 | -0.26       | -0.21              | -0.29           | 1.00            | -0.50       | 0.26         |
| Work Output                          | -0.28      | 0.32       | -0.27  | -0.10                | 0.10                          | -0.22                         | 0.06                                 | -0.14   | 0.15       | -0.03    | 0.16                  | 0.12        | 0.13               | 0.14            | -0.50           | 1.00        | -0.35        |
| Work Cutback                         | 0.14       | -0.18      | 0.04   | 0.05                 | 0.01                          | 0.10                          | 0.05                                 | 0.07    | 0.03       | 0.04     | -0.03                 | -0.03       | 0.00               | -0.03           | 0.26            | -0.35       | 1.00         |
| Depression                           | 1.00       | -0.30      | 0.49   | 0.23                 | -0.12                         | 0.14                          | -0.15                                | 0.58    | -0.09      | 0.26     | -0.07                 | -0.05       | 0.00               | -0.21           | 0.25            | -0.17       | 0.20         |
| Activation                           | -0.30      | 1.00       | -0.20  | 0.00                 | -0.09                         | -0.01                         | 0.25                                 | -0.18   | 0.37       | -0.05    | 0.31                  | 0.30        | 0.38               | 0.38            | -0.52           | 0.34        | -0.17        |
| Stress                               | 0.49       | -0.20      | 1.00   | 0.32                 | -0.11                         | 0.13                          | -0.18                                | 0.54    | 0.05       | 0.39     | 0.06                  | 0.10        | 0.16               | -0.10           | 0.21            | -0.23       | 0.01         |
| Emotional Exhaustion                 | 0.23       | 0.00       | 0.32   | 1.00                 | -0.01                         | 0.08                          | 0.01                                 | 0.18    | 0.21       | 0.28     | 0.09                  | 0.19        | 0.17               | 0.05            | 0.13            | -0.19       | -0.05        |
| Positive Beliefs about Stress        | -0.12      | -0.09      | -0.11  | -0.01                | 1.00                          | -0.34                         | 0.20                                 | -0.10   | 0.18       | 0.00     | -0.16                 | -0.12       | -0.12              | 0.04            | 0.01            | 0.01        | 0.02         |
| Negative Beliefs about Stress        | 0.14       | -0.01      | 0.13   | 0.08                 | -0.34                         | 1.00                          | 0.00                                 | 0.14    | -0.02      | 0.00     | 0.06                  | 0.17        | 0.18               | -0.04           | -0.01           | 0.02        | 0.05         |
| Controllability Beliefs about Stress | -0.15      | 0.25       | -0.18  | 0.01                 | 0.20                          | 0.00                          | 1.00                                 | -0.01   | 0.21       | -0.02    | 0.04                  | 0.08        | 0.09               | 0.24            | -0.12           | 0.11        | -0.01        |
| Anxiety                              | 0.58       | -0.18      | 0.54   | 0.18                 | -0.10                         | 0.14                          | -0.01                                | 1.00    | -0.02      | 0.26     | 0.03                  | 0.06        | 0.08               | -0.09           | 0.22            | -0.16       | 0.05         |



Table S4. *Between-group Effect Sizes and Results of Analyses of Covariance (ANCOVA) in Participants with values of CES-D  $\geq 20$  for the Primary and Secondary Outcomes at Post-Test and Follow-Up.*

| Outcome and Assessment Point                | Effect Size |            | ANCOVA   |          |
|---------------------------------------------|-------------|------------|----------|----------|
|                                             | <i>d</i>    | 95%CI      | <i>F</i> | <i>p</i> |
| <b>Primary Outcome</b>                      |             |            |          |          |
| Depression (CES-D)                          |             |            |          |          |
| - Post                                      | 0.37        | 0.02-0.72  | 4.52     | 0.035    |
| - Follow-up                                 | 0.34        | -0.03-0.70 | 3.22     | 0.074    |
| <b>Mental Health</b>                        |             |            |          |          |
| Behavioral Activation for Depression (BADS) |             |            |          |          |
| - Post                                      | 0.68        | 0.33-1.04  | 15.26    | <0.001   |
| - Follow-up                                 | 0.48        | 0.10-0.86  | 5.79     | 0.026    |
| Perceived Stress (PSS-10)                   |             |            |          |          |
| - Post                                      | 0.52        | 0.18-0.87  | 9.57     | 0.003    |
| - Follow-up                                 | 0.40        | 0.04-0.76  | 5.57     | 0.019    |
| Anxiety (STAI-6)                            |             |            |          |          |
| - Post                                      | 0.33        | -0.09-0.74 | 1.93     | 0.188    |
| - Follow-up                                 | 0.14        | -0.28-0.56 | 0.04     | 1.000    |
| Worrying (AWQ)                              |             |            |          |          |
| - Post                                      | 0.33        | -0.04-0.70 | 3.49     | 0.065    |
| - Follow-up                                 | 0.39        | -0.01-0.78 | 3.72     | 0.063    |
| Emotional Exhaustion (MBI-S)                |             |            |          |          |
| - Post                                      | 0.02        | -0.34-0.38 | 0.02     | 1.000    |
| - Follow-up                                 | 0.65        | 0.32-0.98  | 20.75    | <0.001   |
| <b>Academic Outcomes</b>                    |             |            |          |          |
| Work Impairment (WIS)                       |             |            |          |          |
| - Post                                      | 0.22        | -0.11-0.55 | 2.60     | 0.107    |
| - Follow-up                                 | 0.36        | -0.02-0.75 | 3.81     | 0.061    |
| Work Output (WOS)                           |             |            |          |          |
| - Post                                      | 0.38        | 0.07-0.70  | 5.86     | 0.016    |
| - Follow-up                                 | 0.32        | -0.17-0.81 | 0.86     | 0.390    |
| Work Cutback (PS-S)                         |             |            |          |          |
| - Post                                      | 0.26        | -0.10-0.62 | 1.91     | 0.171    |
| - Follow-up                                 | 0.33        | -0.02-0.67 | 3.43     | 0.065    |
| College Self-Efficacy (CSEI)                |             |            |          |          |
| - Post                                      | 0.02        | -0.34-0.37 | -0.01    | 1.000    |
| - Follow-up                                 | 0.00        | -0.34-0.34 | 0.00     | 0.949    |

**Risk and Protective Factors**



|                                             |      |            |       |        |
|---------------------------------------------|------|------------|-------|--------|
| Resilience (CD-RISC)                        |      |            |       |        |
| - Post                                      | 0.23 | -0.14-0.61 | 1.42  | 0.241  |
| - Follow-up                                 | 0.27 | -0.06-0.61 | 3.13  | 0.077  |
| Emotion Regulation Competencies (SEK-27)    |      |            |       |        |
| - Post                                      | 0.65 | 0.32-0.98  | 19.36 | <0.001 |
| - Follow-up                                 | 0.14 | -0.20-0.48 | 0.52  | 0.471  |
| Self-Compassion (SCS-D)                     |      |            |       |        |
| - Post                                      | 0.60 | 0.26-0.94  | 17.32 | <0.001 |
| - Follow-up                                 | 0.61 | 0.21-1.00  | 10.01 | 0.014  |
| Self-Esteem (RSES)                          |      |            |       |        |
| - Post                                      | 0.35 | 0.00-0.70  | 8.53  | 0.004  |
| - Follow-up                                 | 0.12 | -0.21-0.45 | 0.38  | 0.536  |
| Negative Beliefs about Stress (BASS)        |      |            |       |        |
| - Post                                      | 0.06 | -0.28-0.40 | 0.12  | 0.727  |
| - Follow-up                                 | 0.37 | -0.03-0.77 | 3.29  | 0.086  |
| Positive Beliefs about Stress (BASS)        |      |            |       |        |
| - Post                                      | 0.21 | -0.13-0.54 | 2.14  | 0.143  |
| - Follow-up                                 | 0.23 | -0.12-0.57 | 2.25  | 0.134  |
| Controllability Beliefs about Stress (BASS) |      |            |       |        |
| - Post                                      | 0.73 | 0.39-1.07  | 20.15 | <0.001 |
| - Follow-up                                 | 0.88 | 0.52-1.25  | 16.73 | 0.003  |

---

*Note:* These analyses are based on the  $n=138$  (69%) participants with values of CES-D  $\geq 20$  at baseline (IG:  $n=66/66\%$ ; CG:  $n=72/72\%$ ).

Table S5. *Intervention Usefulness, Difficulty and Duration Ratings in the Intervention Group.*

| Module and Criterion | Mean Rating | <i>n</i> |
|----------------------|-------------|----------|
| <b>Module 1</b>      |             |          |
| - Usefulness (1-5)   | 3.95        | 88       |
| - Difficulty (1-5)   | 2.13        | 88       |
| - Duration (1-4)     | 2.32        | 87       |
| <b>Module 2</b>      |             |          |
| - Usefulness (1-5)   | 4.18        | 82       |
| - Difficulty (1-5)   | 2.41        | 83       |
| - Duration (1-4)     | 2.71        | 83       |
| <b>Module 3</b>      |             |          |
| - Usefulness (1-5)   | 4.22        | 74       |
| - Difficulty (1-5)   | 2.34        | 73       |
| - Duration (1-4)     | 3.00        | 74       |
| <b>Module 4</b>      |             |          |
| - Usefulness (1-5)   | 4.28        | 72       |
| - Difficulty (1-5)   | 2.08        | 72       |
| - Duration (1-4)     | 2.54        | 72       |
| <b>Module 5</b>      |             |          |
| - Usefulness (1-5)   | 4.34        | 65       |
| - Difficulty (1-5)   | 2.56        | 66       |
| - Duration (1-4)     | 2.94        | 64       |
| <b>Module 6</b>      |             |          |
| - Usefulness (1-5)   | 4.29        | 63       |
| - Difficulty (1-5)   | 2.68        | 63       |
| - Duration (1-4)     | 3.06        | 63       |
| <b>Module 7</b>      |             |          |
| - Usefulness (1-5)   | 4.27        | 60       |
| - Difficulty (1-5)   | 1.65        | 60       |
| - Duration (1-4)     | 2.08        | 61       |

*Note:* Rating options for duration were: 1=less than ½ hour; 2= ½ to 1 hour; 3=1 to 1½ hours; 4=more than 1½ hours.

Table S6. *Participants' satisfaction with the interventions (assessed at post-test).*

| Ratings                                                                                                    | Intervention Group<br>( <i>StudiCare Fernstudierende</i> ) |      | Active Control Group<br>(Psychoeducation) |      |
|------------------------------------------------------------------------------------------------------------|------------------------------------------------------------|------|-------------------------------------------|------|
|                                                                                                            | <i>n</i>                                                   | %    | <i>n</i>                                  | %    |
| Quality of the training rated as excellent or good                                                         | 78                                                         | 95.1 | 69                                        | 74.2 |
| Indication that the training was the kind of intervention they wanted to receive (generally or definitely) | 78                                                         | 95.1 | 32                                        | 34.4 |
| Indication that the own needs were almost all or mostly met                                                | 73                                                         | 89   | 30                                        | 32.3 |
| Inclination to recommend the training to a friend in need of similar help                                  | 77                                                         | 93.9 | 45                                        | 48.4 |
| Satisfaction with the amount of help received (mostly or very satisfied)                                   | 77                                                         | 93.9 | 38                                        | 40.9 |
| Indication that the training has helped (a great deal) to deal more effectively with problems              | 79                                                         | 96.3 | 35                                        | 37.6 |
| Satisfaction with the training in a general, overall sense (mostly or very satisfied)                      | 78                                                         | 95.1 | 32                                        | 34.4 |
| Inclination to use the training again if in need for help                                                  | 70                                                         | 85.4 | 43                                        | 46.2 |

Figure S1. *Effect sizes (standardized posterior probability) estimated by the joint Bayesian model at post-test and follow-up*

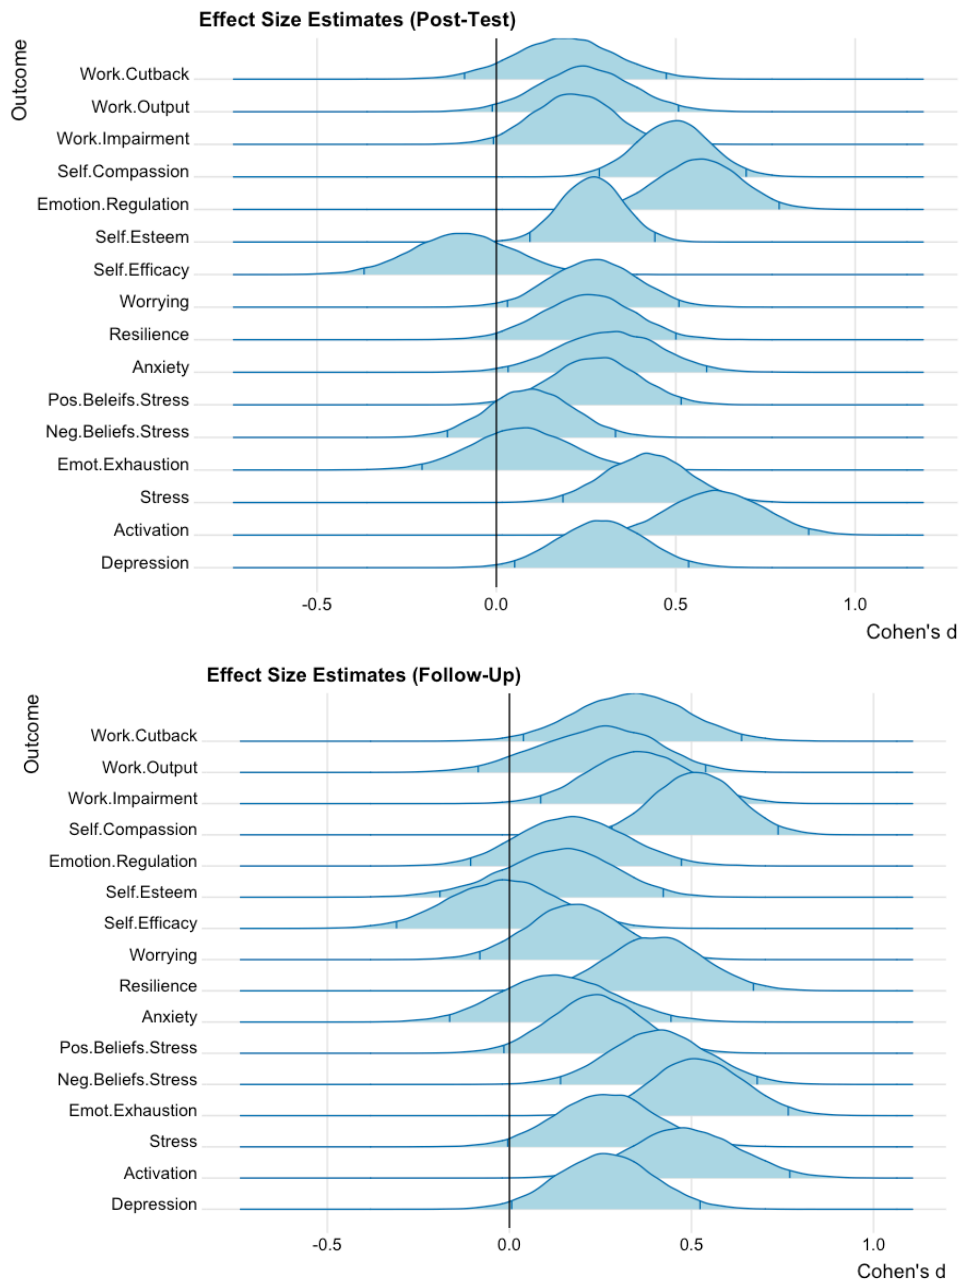

Supplement: mmc1.pdf [file mmc1.pdf]
